# Supplementary material for: Fungi-derived hierarchically porous carbons for high-performance supercapacitors
Source: Royal Society of Chemistry journal article supplement (doi:10.1039/c4ra13358g), 2014-12-09
Supplement: c4ra13358g1.pdf [file c4ra13358g1.pdf]

**Electronic Supporting Information:**

**Fungi-derived hierarchically porous carbons for high-performance  
supercapacitors**

Jiacheng Wang,\* Qian Liu\*

State Key Laboratory of High Performance Ceramics and Superfine Microstructure, Shanghai  
Institute of Ceramics, Chinese Academy of Sciences, Shanghai 200050, P. R. China. Tel: +86-21-  
52412714; Fax: +86-21-52413122

Email: [jiacheng.wang@mail.sic.ac.cn](mailto:jiacheng.wang@mail.sic.ac.cn); [qianliu@sunm.shcnc.ac.cn](mailto:qianliu@sunm.shcnc.ac.cn)

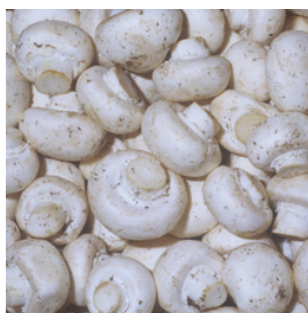

**Fig. S1** The photograph of fresh *Agaricus* used in present research

**Table S1.** The contents of Nitrogen and Hydrogen elements in the fungi-based char and porous carbons.<sup>a</sup>

| Name   | C (wt%) | N (wt%) | H (wt%) | O (wt%) |
|--------|---------|---------|---------|---------|
| char   | 72.93   | 5.55    | 1.67    | 19.85   |
| AC-1/2 | 80.03   | 4.75    | 0.74    | 14.48   |
| AC-2   | 83.35   | 3.75    | 0.53    | 12.37   |
| AC-4   | 88.69   | 2.15    | 0.63    | 8.53    |

<sup>a</sup>The contents of CNH elements were determined by CNH elemental analyser, and the content of O element was calculated by the equation  $C(\text{wt}\%) + N(\text{wt}\%) + H(\text{wt}\%) + O(\text{wt}\%) = 100\%$ .

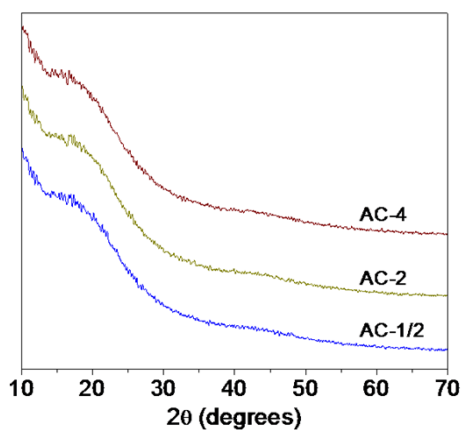

**Fig. S2** Wide-angle X-ray diffraction curves of the fungi-based ACs prepared with different KOH/char mass ratios.
